# Supplementary material for: Combined Antitumor Effect of the Serine Protease Urokinase Inhibitor Upamostat and the Sphingosine Kinase 2 Inhibitor Opaganib on Cholangiocarcinoma Patient-Derived Xenografts
Source: MDPI journal article supplement (doi:10.3390/cancers16051050), 2024-03-05
Supplement: s1 [file s1]

H&E staining was performed to compare the characteristics of the original tumor (F0) and the first-generation mouse xenograft (F1). H&E staining revealed that both tumors were morphologically very similar (Figure S1).

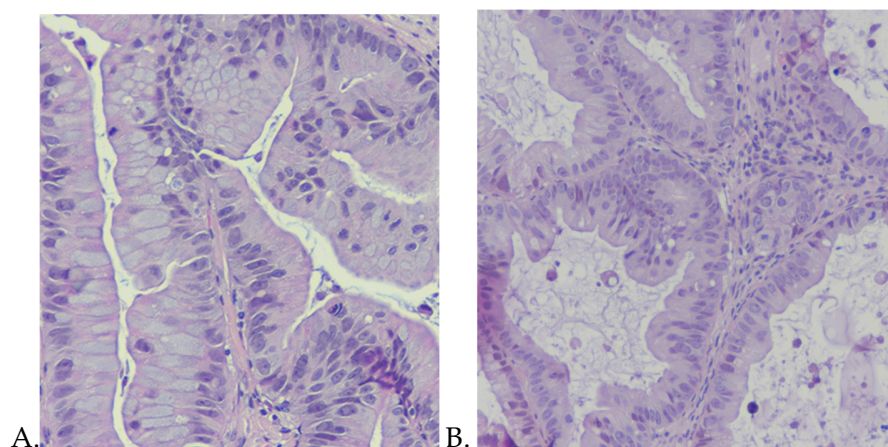

**Figure S1.** Pathology of the original tumor and first-generation mouse xenograft. **A.** H&E stain of the original tumor from the patient. **B.** H&E stain of the first-generation mouse xenograft

**Table S1.:** Pharmacokinetic (PK) analysis

| Compound Administered  | Animals /Dose<br>mg/kg/administration | concentration(ng/g) |        |          |           |        |          |           |        |          |
|------------------------|---------------------------------------|---------------------|--------|----------|-----------|--------|----------|-----------|--------|----------|
|                        |                                       | Tumor               |        |          | Liver     |        |          | Muscle    |        |          |
|                        |                                       | Upamostat           | WX-UK1 | Opaganib | Upamostat | WX-UK1 | Opaganib | Upamostat | WX-UK1 | Opaganib |
| Upamostat              | 70 mg/kg                              | 61.0                | 66.3   | 0.0      | 8.8       | 83.9   | 0.0      | <LOQ      | 102.4  | 0.0      |
| Upamostat              | 70 mg/kg                              | 55.8                | 68.3   | 0.0      | 9.3       | 69.5   | 0.0      | <LOQ      | 26.6   | <LOQ     |
| Upamostat              | 70 mg/kg                              | 10.0                | 68.6   | <LOQ     | 14.9      | 56.9   | <LOQ     | <LOQ      | 8.6    | <LOQ     |
| Opaganib               | 50 mg/kg                              | <LOQ                | <LOQ   | 4.8      | <LOQ      | 0.0    | 4.8      | 0.0       | 0.0    | <LOQ     |
| Opaganib               | 50 mg/kg                              | <LOQ                | <LOQ   | <LOQ     | 0.0       | 0.0    | 6.7      | 0.0       | 0.0    | <LOQ     |
| Opaganib               | 50 mg/kg                              | 0.0                 | 0.0    | 4.6      | 0.0       | 0.0    | <LOQ     | 0.0       | 0.0    | <LOQ     |
| Upamostat and Opaganib | 70 mg/kg and 50 mg/kg                 | 36.5                | 257.4  | 8.3      | 18.8      | 77.9   | 30.3     | <LOQ      | 6.4    | <LOQ     |
| Upamostat and Opaganib | 70 mg/kg and 50 mg/kg                 | 9.5                 | 130.3  | <LOQ     | <LOQ      | 30.5   | <LOQ     | 0.0       | 6.4    | <LOQ     |
| Upamostat and Opaganib | 70 mg/kg and 50 mg/kg                 | 33.7                | 115.6  | 4.0      | <LOQ      | 33.0   | 4.1      | 0.0       | 5.4    | <LOQ     |
| Control                | Diluent                               | 0.0                 | 0.0    | <LOQ     | 0.0       | 0.0    | 0.0      | 0.0       | 0.0    | <LOQ     |
| Control                | Diluent                               | 0.0                 | 0.0    | <LOQ     | <LOQ      | 0.0    | 0.0      | 0.0       | 0.0    | 0.0      |
| Control                | Diluent                               | 0.0                 | 0.0    | <LOQ     | <LOQ      | 0.0    | 0.0      | <LOQ      | <LOQ   | <LOQ     |
